## Smoking Cessation Services Minimum Data Set

Running Head: Smoking Cessation Services Minimum Data Set

### **Evaluating clinical stop-smoking services globally: Proposal for a minimum data set**

Andrew L. Skinner<sup>1,2</sup>, Robert West<sup>3</sup>, Martin Raw<sup>4</sup>, Emma Anderson<sup>5</sup>, Marcus R. Munafò<sup>1,2</sup>

1. MRC Integrative Epidemiology Unit (IEU) at the University of Bristol, United Kingdom.

2. United Kingdom Centre for Tobacco Control Studies and School of Experimental Psychology, University of Bristol, United Kingdom.

3. United Kingdom Centre for Tobacco Control Studies and Department of Epidemiology and Public Health, University College London, United Kingdom.

4. United Kingdom Centre for Tobacco Control Studies and Division of Epidemiology and Public Health, University of Nottingham, Nottingham, United Kingdom.

5. School of Social and Community Medicine, University of Bristol, United Kingdom.

Corresponding Author: Andrew Skinner, School of Experimental Psychology, University of Bristol, 12a Priory Road, Bristol BS8 1TU, United Kingdom. T: +44.117.9288581; F: +44.117.9288588; E: [andy.skinner@bristol.ac.uk](mailto:andy.skinner@bristol.ac.uk)

Keywords: Smoking Cessation Service Minimum Data Set

## Smoking Cessation Services Minimum Data Set

### *Abstract*

*Background and aims:* Behavioural and pharmacological support for smoking cessation improves the chances of success and represents a highly cost-effective way of preventing chronic disease and premature death. There are a large number of clinical stop-smoking services around the world. These could be connected into a global network to provide data to assess what treatment components are most effective, for what populations, in what settings. This requires data to be collected according to a minimum standard set of data items. This paper sets out a proposal for this global minimum data set.

*Methods:* We reviewed sets of data items used in clinical services that have already benefited from standardised approaches to using data. We identified client and treatment data items that may directly or indirectly influence outcome, and outcome variables that were practicable to obtain in clinical practice. We then consulted service providers in countries that may have an interest in taking part in a global network of smoking cessation services, and revised the sets of data items according to their feedback.

*Results:* Three sets of data items are proposed. The first is a set of features characterising treatments offered by a service. The second is a core set of data items describing clients' characteristics, engagement with the service, and outcomes. The third is an extended set of client data items to be captured in addition to the core data items wherever resources permit.

*Conclusions:* We propose minimum standards for capturing data from clinical smoking cessation services globally. This could provide a basis for meaningful evaluations of different smoking cessation treatments in different populations in a variety of settings across many countries.

## *Introduction*

There are currently over 1 billion tobacco users worldwide [1]. Despite the prevalence of tobacco use decreasing in many countries, this number is not falling, partly because of increasing prevalence in other countries and partly because of population growth. Some of these users may be able to stop when they choose, but the success rates of unaided quit attempts [2] and findings from clinical trials and population studies [3] indicate that most would benefit from support in their attempt to stop smoking. Article 14 of the World Health Organization Framework Convention on Tobacco Control (FCTC) requires Parties to take effective measures to promote tobacco use cessation and adequate treatment for tobacco dependence. Guidelines for the implementation of Article 14 were adopted in November 2010 and outline what is needed to enable Parties to meet their obligations under that Article [4]. Current evidence, however, indicates that only a small minority of countries, and very few low- and middle-income countries, have the infrastructure and systems elements in place to be able to meet these obligations [5, 6].

Studies in some high-income countries suggest specific medicines and types of behavioural support can improve smokers' chances of long-term success at stopping [7]. However, in order to apply this work globally we ideally need to know more about real world effectiveness throughout the world. More broadly, there is considerable room for improvement in stop-smoking support in all settings. We need to build incrementally on our understanding of how combinations of behaviour change techniques, delivered in what way, to what kinds of smoker in what settings provide the optimal outcomes [7].

In the future, the challenge for tobacco use cessation will be to improve on the strategies currently available and more importantly, to identify support options that are clearly effective, cost effective, and affordable in different populations and different regions. Randomised controlled trials (RCTs) can only take us so far in this endeavour, and suffer from the well-established limitations of generalizability, practicability, cost and timescale [8]. A programme of research is required, complementing the existing evidence base from

## Smoking Cessation Services Minimum Data Set

RCTs, which provides vital information about what approaches work best across a broad range of settings. This programme should consist of quasi-experimental and epidemiological studies that examine variations in smoking cessation outcomes among different cohorts of smokers using different methods of quitting, adjusting for as many possible confounding factors as possible [9]. This kind of approach has already paid dividends in the United Kingdom, where the combination of a common national standard for outcome assessment [10], and widespread use of a single database for recording crucial information, has enabled confirmation of findings from RCTs concerning the relative effectiveness of different forms of medication, and identification of specific treatments with improved success rates [11].

Our vision is to extend the success of this approach globally. By connecting clinical smoking cessation services from many countries to form a global network of service providers, it will be possible to share information about the performance of different treatments in different scenarios within a common frame of reference, and to assess and identify optimal treatment strategies for different populations in different settings on a global scale. A key enabler in connecting providers to form a global network will be establishing a standardised, minimum set of data that should be captured by all clinical smoking cessation services in the network. Here, we take the first step towards defining this minimum data set.

We propose data sets that describe the treatments offered by services, and client's engagement with these services. The data required to describe client's engagement with smoking cessation services can be extensive. Regional differences in resources (e.g., computer equipment, network infrastructure, measurement devices) means the extent of data that can be captured by services will vary. We therefore suggest that, rather than a single client data set, we define a core set of that should be captured in every smoking cessation service setting, and an extended, richer set of data items that should be captured wherever resources make this possible. We propose candidate sets of core and extended data items.

## Smoking Cessation Services Minimum Data Set

Not all countries have sufficient infrastructure to support dedicated clinical smoking cessation services. In those that do not, there is often more of a focus on delivery of brief advice supporting smoking cessation through alternative, existing mechanisms, such as tuberculosis clinics [12, 13]. These brief advice approaches vary considerably from the services offered by smoking cessation clinics, largely because they are not designed to follow-up and track client quit attempts. Consequently, the data describing brief advice approaches will vary significantly from data describing clinical smoking cessation services. We therefore propose that defining minimum data sets for brief advice approaches should be a separate (but linked) activity, and do not address this here.

### *Methods*

For the treatment data, we took as our starting point a list of behaviour change techniques found in UK Stop Smoking Services (SSS) [14]. From this we selected only those treatment features found to be associated with improved quit outcomes (either self-reported or CO verified).

For client data, we began with the data items listed in the latest version (v9) of the United Kingdom's National Centre for Smoking Cessation and Training's Stop Smoking Service Client Record Form [15]. Through an iterative process of modification and review, the authors, who have extensive experience of international smoking cessation services and epidemiological studies of tobacco use, arrived at initial sets of core and extended client data items. As this process of selection was more organic, justification for the inclusion of each client data item is included in Tables 2 and 3.

In addition to regional differences in resources available to capture data, there will also be regional variations in factors such as the way data items are labelled, the names of drugs, and the types of questions that are culturally acceptable to ask. To explore these issues, feedback on the initial proposals was sought from colleagues in the International Cooperation Centre for the Framework Convention on Tobacco Control in Uruguay, and the

## Smoking Cessation Services Minimum Data Set

Centre for Tobacco Studies in Syria. In both cases the feedback was positive, with agreement that the choice of data items for all sets was appropriate. The main issue identified with the initial proposals was that they included CO measurements in the core client data set. The availability of CO measurement is limited in some regions, so CO readings and CO verification statuses were moved from the core to the extended client set. It was noted that 'willingness to quit' was not included, and this was added to the core client data set. Finally, it was noted that 'gender' would be more acceptable than 'sex', and that 'age' would be preferable to 'date of birth', and these changes were made.

### *Results*

The proposed set of treatment data items is shown in Table 1. The proposed set of core data items that should be captured in every clinical smoking cessation service setting is shown in Table 2. The proposed set of extended data items that should be captured where resources permit is shown in Table 3.

Table 1 – Treatment information (one record per type of treatment on offer)

| Item label                            | Definition                                                                                                  | Response Options                                                                                                                                                   |
|---------------------------------------|-------------------------------------------------------------------------------------------------------------|--------------------------------------------------------------------------------------------------------------------------------------------------------------------|
| Name of service                       | Name of current service                                                                                     | Free text                                                                                                                                                          |
| Name of sub-service                   | Name of component of current service                                                                        | Free text                                                                                                                                                          |
| Service setting                       | Type of environment in which service is delivered                                                           | One from: Community   Psychiatric   Hospital   Pharmacy   Dental   General Practice   Maternity   Children's centre   Educational   Prison   Military base   Other |
| Treatment mode                        | The mode of the treatment provided                                                                          | One from: Closed Group   Couple/Family   Telephone Support   One-to-one Support   Open (rolling) Group   Drop-in Clinic                                            |
| Average session length                | Length of sessions in minutes, taking account of the fact that the first session is often longer            | Length in minutes                                                                                                                                                  |
| Number of sessions                    | Total number of sessions                                                                                    | Number of sessions                                                                                                                                                 |
| Frequency of sessions                 | Number of sessions per week                                                                                 | Number of sessions/week                                                                                                                                            |
| Duration of behavioural support       | Number of weeks post-quit date that support is provided                                                     | Number of weeks                                                                                                                                                    |
| <b>Content of behavioural support</b> |                                                                                                             |                                                                                                                                                                    |
| Strengthen ex-smoker identity         | Advise on the importance of 'not a puff no matter what' and starting to consider smoking as 'not an option' | Yes   No                                                                                                                                                           |
| Elicit client views                   | Check client's understanding and ensure that s/he has an opportunity to ask questions and express concerns  | Yes   No                                                                                                                                                           |

Smoking Cessation Services Minimum Data Set

|                                                                           |                                                                                                                                                                                                   |          |
|---------------------------------------------------------------------------|---------------------------------------------------------------------------------------------------------------------------------------------------------------------------------------------------|----------|
| Measure CO                                                                | At the first session this provides an indication to the smoker and the practitioner of the degree of toxin exposure from smoking; after the quit date provides confirmation of smoking abstinence | Yes   No |
| Explain the purpose of CO monitoring                                      | Provides motivation to the client not to smoke after the quit date and rewards the client for not smoking                                                                                         | Yes   No |
| Give options for additional and later support                             | Offer additional phone or text message support.                                                                                                                                                   | Yes   No |
| Provide rewards contingent on successfully stopping smoking               | Be fulsome in praise for not smoking at each post-quit visit.                                                                                                                                     | Yes   No |
| Advise on changing routine                                                | Discuss with the client, and get agreement to, ways of avoiding specific smoking triggers.                                                                                                        | Yes   No |
| Facilitate relapse prevention and coping                                  | Discuss with client specific ways of dealing with cravings when then arise without smoking.                                                                                                       | Yes   No |
| Advise on stop smoking medicine                                           | Try to ensure that the smoker agrees to use the most effective stop-smoking medication available in the locality (ideally either varenicline or NRT patch plus a faster acting product).          | Yes   No |
| Ask about experiences of stop smoking medication that the smoker is using | Check that the client is using the stop-smoking medication properly and address any concerns about adverse effects.                                                                               | Yes   No |
| Advise on conserving mental resources                                     | Advise on how to ensure that client gets enough sleep and minimises exposure to stress.                                                                                                           | Yes   No |
| Advise on/facilitate use of social support                                | Discuss with client ways in which s/he can get the support of friends or family.                                                                                                                  | Yes   No |
| Summarise information/confirm client decisions                            | Provide a summary of the key points of each session and up to three things to keep in mind between it and the next session. Confirm client's decisions and commitments made during the session.   | Yes   No |
| Provide reassurance                                                       | Address client's concerns and provide reassurance that adverse or worrying experiences are normal and will subside.                                                                               | Yes   No |
| Boost motivation and self-efficacy                                        | Express belief in the client's ability to succeed, and help the client to believe that s/he will succeed.                                                                                         | Yes   No |

|                                            |                                                                                                                   |          |
|--------------------------------------------|-------------------------------------------------------------------------------------------------------------------|----------|
| Provide information on withdrawal symptoms | Ensure that the client knows what to expect in terms of the nature, severity and duration of withdrawal symptoms. | Yes   No |
|--------------------------------------------|-------------------------------------------------------------------------------------------------------------------|----------|

Table 2 – Core client data items

| Item label                         | Definition                                                                  | Response Options                                                                                                         | Justification                                                                                       |
|------------------------------------|-----------------------------------------------------------------------------|--------------------------------------------------------------------------------------------------------------------------|-----------------------------------------------------------------------------------------------------|
| Age                                | Client's age in years                                                       | Integer                                                                                                                  | Enables analysis by client age                                                                      |
| Gender                             | Client's gender                                                             | Male   Female                                                                                                            | Enables analysis by client sex                                                                      |
| Usual daily cigarette consumption  | Number of cigarettes smoked usually smoked each day                         | Integer                                                                                                                  | Provides baseline measure of smoking behaviour                                                      |
| Time to first cigarette of the day | How many minutes until client has first cigarette of the day?               | One from:<br>within 5 mins   6 to 30 mins   31 to 60 mins   over 60 mins                                                 | Enables additional analysis by 'time to first cigarette' (important indicator of smoking behaviour) |
| Willing to quit?                   | Client's willingness to set a target quit date                              | Yes   No                                                                                                                 | Indicates level of client commitment to quit attempt                                                |
| Agreed quit date                   | Date the client plans to stop smoking completely, with support from service | Day/Month/Year                                                                                                           | Enables scheduling of treatments and monitoring of quit attempt                                     |
| Pharmacological support used       | All of the pharmacological supports planned to be used by client            | Any from (dummy coded):<br>Varenicline   Bupropion   Cytisine   Nortriptyline   NRT   Nicotine vapourising device        | Enables analysis at the level of pharmacological support                                            |
| NRT support used                   | All of the types of NRT planned to be used by client                        | Any from (dummy coded):<br>None   Patch   Gum   Lozenge   Nasal Spray   Mouth Spray   Oral Strips   Inhalator   Microtab | Enables analysis at the level of NRT                                                                |
| Date of 4 week visit               | Date of client's 4 week visit                                               | Day/Month/Year                                                                                                           | Enables scheduling of mid-treatment follow-                                                         |

Smoking Cessation Services Minimum Data Set

|                                                |                                                                |                              |                                                        |
|------------------------------------------------|----------------------------------------------------------------|------------------------------|--------------------------------------------------------|
|                                                | to service                                                     |                              | up session                                             |
| 4 weeks: self-report no puff in past 2 weeks   | No smoking at all in the past 2 weeks at 4-week follow up      | Yes   No   Lost to follow up | Provides mid-treatment measure of smoking behaviour    |
| Date of 12 week visit                          | Date of client's 12 week visit to service                      | Day/Month/Year               | Enables scheduling of final session                    |
| 12 weeks: self-report no puff in past 10 weeks | No smoking at all in the past 4 weeks at the 12-week follow up | Yes   No   Lost to follow up | Provides end of treatment measure of smoking behaviour |

Table 3 – Extended client data items

| Item label                 | Definition                                                                                                | Response Options               | Justification                                         |
|----------------------------|-----------------------------------------------------------------------------------------------------------|--------------------------------|-------------------------------------------------------|
| <b>Advisor information</b> |                                                                                                           |                                |                                                       |
| Advisor ID                 | The service advisor's unique identification number, assigned by the service's national co-ordinating body | Integer assigned by the system | Enables continuity of service across sessions         |
| Venue ID                   | A unique code for the service site, assigned by the service's national co-ordinating body                 | Integer assigned by the system | Enables additional analysis at level of service venue |
| <b>Client information</b>  |                                                                                                           |                                |                                                       |
| Pregnant                   | Is the client pregnant?                                                                                   | Yes   No                       | Enables specific analysis in pregnancy                |
| Breastfeeding              | Is the client breast-feeding?                                                                             | Yes   No                       | Enables specific analysis when breast-feeding         |

Smoking Cessation Services Minimum Data Set

|                                                                        |                                                                                 |                                                                                                                                                                                              |                                                                                   |
|------------------------------------------------------------------------|---------------------------------------------------------------------------------|----------------------------------------------------------------------------------------------------------------------------------------------------------------------------------------------|-----------------------------------------------------------------------------------|
| Education level                                                        | Years of formal education                                                       | One from:<br>Secondary   Tertiary   Bachelors  <br>Masters   Doctoral                                                                                                                        | Enables additional analysis by education level                                    |
| Occupation                                                             | Category of client's occupation                                                 | One from:<br>Managerial/Professional  <br>Intermediate   Routine and Manual<br> Home Carer   Retired  Never<br>Worked/Long Term Unemployed  <br>Unable to work (sick/disabled)  <br>Prisoner | Enables additional analysis by occupation                                         |
| Currently treated for physical health problem?                         | Is the client currently being treated for any physical health problems?         | Yes   No                                                                                                                                                                                     | Enables treatments for physical health problems to be factored into analysis      |
| Currently treated for mental health problems?                          | Is the client currently being treated for any mental health problems?           | Yes   No                                                                                                                                                                                     | Enables treatments for mental health problems to be factored into analysis        |
| Currently treated for drug or alcohol problem?                         | Is the client currently being treated for any alcohol or drug related problems? | Yes   No                                                                                                                                                                                     | Enables treatments for drug and alcohol problems to be factored into analysis     |
| Current medications                                                    | Any medication the client is currently taking                                   | Select from fixed list (with typing completion) plus specified other                                                                                                                         | Enables any medications taken to be factored into analysis                        |
| Partner smoking status                                                 | Does the client's partner smoke?                                                | Yes   No   Not applicable                                                                                                                                                                    | Enables partner smoking status to be used in analysis (e.g., as negative control) |
| How much time currently spent with urges to smoke? (prior to quitting) | How much time does the client currently spend with urges to smoke?              | One from:<br>None of the time   A little of the time  <br>Some of the Time   A lot of the time  <br>Almost all of the time                                                                   | Enables assessment of treatment during quit attempt                               |
| How strong are the urges? (prior to quitting)                          | How strong are the client's urges to smoke?                                     | One from:<br>No urges   Slight   Moderate   Strong  <br>Extremely strong                                                                                                                     | Enables assessment of treatment during quit attempt                               |

Smoking Cessation Services Minimum Data Set

|                                                    |                                                                        |                                                                                                     |                                                                                    |
|----------------------------------------------------|------------------------------------------------------------------------|-----------------------------------------------------------------------------------------------------|------------------------------------------------------------------------------------|
| Weeks since most recent quit attempt               | How many weeks since the client's most recent attempt to quit smoking? | Integer                                                                                             | Enables selection and planning of treatment                                        |
| How long recent quit attempt lasted                | How many weeks did the client's most recent attempt to quit last?      | Integer                                                                                             | Enables selection and planning of treatment                                        |
| Past use of stop smoking medicines                 | Any medicines the client has used in previous attempts to quit         | Any from:<br>Varenicline   Bupropion   Cytisine   Nortriptyline   NRT   Nicotine vapourising device | Enables selection and planning of treatment                                        |
| If multiple licensed pharmacological supports used | Are these used at same time or consecutively?                          | One from:<br>Used at same time   Used consecutively                                                 | Enables more detailed analysis by pharmacological support                          |
| How client heard about the service                 | How the client heard about the service                                 | One from:<br>GP   Other health professional   Friend/Relative   Advertising   Pharmacy   Other      | Enables analysis by service discovery type                                         |
| <b>Outcome data</b>                                |                                                                        |                                                                                                     |                                                                                    |
| Pre-quit CO reading                                | Measure of carbon monoxide (ppm) in expelled air before quit attempt   | Integer                                                                                             | Provides quantitative measure for confirming smoking status before quit attempt    |
| 4 weeks: CO-reading                                | Measure of carbon monoxide (ppm) in expelled air at 4 week visit       | Integer                                                                                             | Provides quantitative measure for confirming smoking status mid quit attempt       |
| 4 weeks: CO verified 4 week quitter                | Quit status at 4 weeks                                                 | Yes   No   Lost to follow up                                                                        | Provides confirmation of smoking status at 4 week point                            |
| 12 weeks: CO-reading                               | Measure of carbon monoxide (ppm) in expelled air at 12 week visit      | Integer                                                                                             | Provides quantitative measure for confirming smoking status at end of quit attempt |
| 12 weeks: CO verified 12 week quitter              | Quit status at 12 weeks                                                | Yes   No   Lost to follow up                                                                        | Provides confirmation of smoking status at 12 week point                           |

## Smoking Cessation Services Minimum Data Set

### *Discussion*

Whilst individual tobacco cessation clinics using locally-defined measures and methods may be effective to some degree, harmonising the data captured across clinics will make it possible to assess the effectiveness of different treatments in different regions, to identify optimal sets of approaches for supporting smoking cessation in a variety of different settings, and to commission more effective and cost-effective measures that can reach more smokers and increase quit rates. This approach has proved successful in the United Kingdom, through standardisation of outcome assessments, and use of common data structures in the systems supporting services. Our vision is to extend this approach internationally.

Here, we take the first steps by proposing sets of data items that should be captured by clinical smoking cessation services internationally. Our aim is that these proposals should be a starting point for a discussion that converges to identify optimal sets of data items. We invite comments and suggestions on any aspects of these, including; which items should be captured, whether they should be core or extended, and details about how they are labelled and response options. Once an agreed core set has been established it would be a simple matter to set up an online data service that can store the data and provide clinics, practitioners with on-demand access to performance information.

## Smoking Cessation Services Minimum Data Set

### *Acknowledgements*

The authors are members of the United Kingdom Centre for Tobacco and Alcohol Studies, a UKCRC Public Health Research: Centre of Excellence. Funding from British Heart Foundation, Cancer Research UK, Economic and Social Research Council, Medical Research Council (grants MC\_UU\_12013/6 and MC\_UU\_12013/7), and the National Institute for Health Research, under the auspices of the UK Clinical Research Collaboration, is gratefully acknowledged. The authors thank Prof Samer Rastam of the Syrian Center for Tobacco Studies and Amanda Sica of the Honorary Commission for the Fight Against Cancer, Uruguay for feedback on the proposed data sets.

## Smoking Cessation Services Minimum Data Set

### References

1. World-Health-Organization, *WHO Report on the Global Tobacco Epidemic, 2011: Warning about the dangers of tobacco*. 2011: World Health Organization.
2. ASH, *Stopping smoking: The benefits and aids to quitting*. 2014: Action on Smoking and Health.
3. West, R., Raw, M., McNeill, A., Stead, L., Aveyard, P., Bitton, J., et al. *Health-care interventions to promote and assist tobacco cessation: a review of efficacy, effectiveness and affordability for use in national guideline development*. *Addiction*, 2015. 110, 1388-1403.
4. World-Health-Organization. *Guidelines for the implementation of Article 14 of the WHO Framework Convention on Tobacco Control*. 2010; Available from: [http://www.who.int/fctc/protocol/guidelines/adopted/article\\_14/en/index.html](http://www.who.int/fctc/protocol/guidelines/adopted/article_14/en/index.html).
5. Pine-Abata, H., McNeill, A., Murray, R., Bitton, A., Rigotti, N., Raw, M. *A survey of tobacco dependence treatment services in 121 countries*. *Addiction*, 2013. **108**(8): p. 1476-84.
6. Pine-Abata, H., McNeill, A., Raw, M., Bitton, A., Rigotti, N., Murray, R. *A survey of tobacco dependence treatment guidelines in 121 countries*. *Addiction*, 2013. **108**(8): p. 1470-5.
7. Stead, L.F., T. Lancaster, *Combined pharmacotherapy and behavioural interventions for smoking cessation*. *Cochrane Database Syst Rev*, 2012. **10**: p. CD008286.
8. Bellomo, R., S.M. Bagshaw, *Evidence-based medicine: classifying the evidence from clinical trials--the need to consider other dimensions*. *Crit Care*, 2006. **10**(5): p. 232.
9. National-Institute-for-Health-and-Clinical-Excellence. *Smoking cessation services*. 2008; Available from: <http://www.nice.org.uk/guidance/PH10>.
10. West, R., Hajek, P., Stead, L., Stapleton, J. *Outcome criteria in smoking cessation trials: proposal for a common standard*. *Addiction*, 2005. **100**(3): p. 299-303.

Smoking Cessation Services Minimum Data Set

11. West, R., May, S., West, M., Croghan, E., MeEwan, A. *Performance of English stop smoking services in first 10 years: analysis of service monitoring data*. BMJ, 2013, **347**: p. f4921.
12. Lin, Y., Wang, L-X., Qui, L-X., Haung, Q., Shu, Q., et al. *A Smoking Cessation Intervention among tuberculosis clients in rural China*. Public Health Action, 2015, 5(3), p 183-187.
13. Louwagie, G.M, Okuyemi, K.S., Ayo-Yusuf, O.A. *Efficacy of brief motivational interviewing on smoking cessation at tuberculosis clinics in Tshwane, South Africa: a randomized controlled trial*. Addiction, 2014, 109(11), 1942-52.
14. West, R., Walia, A., Hyder, N., Shahab, L, Michie, S. *Behaviour change techniques used by the English Stop Smoking Services and their associations with short-term quit outcomes*. Nicotine & Tobacco Research, 2010, 12(7), 742-747.
15. National Centre for Smoking Cessation and Training. Stop Smoking Service Client Record Form. 2016; Available from [http://www.ncsct.co.uk/usr/pub/SSS\\_CRF.pdf](http://www.ncsct.co.uk/usr/pub/SSS_CRF.pdf)
